# Supplementary material for: Investigations on the Wound Healing Potential of Tilapia Piscidin (TP)2-5 and TP2-6
Source: MDPI journal article supplement (doi:10.3390/md20030205), 2022-03-10
Supplement: s1 [file marinedrugs-1605360-supplementary.pdf › marinedrugs-1605360-supplementary.pdf]

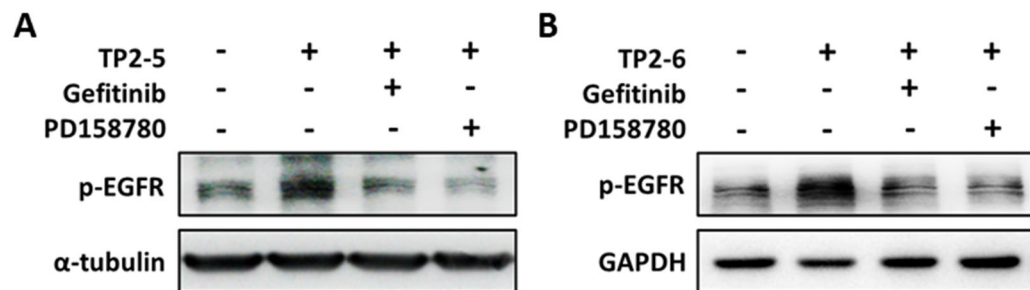

**Figure S1.** Inhibition of TP2-5- and TP2-6-induced epidermal growth factor receptor (EGFR) activation by small-molecule tyrosine kinase inhibitors. Serum-starved HaCaT cells were pretreated with tyrosine kinase inhibitors, Gefitinib (10  $\mu$ M) or PD158780 (10  $\mu$ M), for 2 h and then incubated with 3.91  $\mu$ g/ml of TP2-5 (A) or TP2-6 (B) for 24 h. Phosphorylated EGFR (p-EGFR) levels were detected by immunoblotting.  $\alpha$ -Tubulin and GAPDH were used as loading controls.
